# Supplementary material for: A Novel Nonobese Diabetic/Severe Combined Immunodeficient Xenograft Model for Chronic Lymphocytic Leukemia Reflects Important Clinical Characteristics of the Disease
Source: Oxford University Press journal article supplement (doi:10.1158/0008-5472.can-07-1198), 2007-09-15
Supplement: 00085472can071198-sup-can-07-11supplementary_figure_legends1-3.pdf [file 00085472can071198-sup-can-07-11supplementary_figure_legends1-3.pdf]

**Figure S1 Confirmation of human CLL origin of cells recovered from the spleens of NOD/SCID mice using IgG light chain restriction analysis and detection of chromosomal aberrations by FISH**

Flow cytometric analysis of IgG kappa (A) and lambda (B) light chain expression on the surface of human B-CLL recovered from NOD/SCID mice. (C) A human lymphocyte (bright) surrounded by 5 mouse lymphocytes (dim) showing two green signals for CEP12 (chromosome 12) and one red signal for LSI DS13S319 (chromosome 13q14) indicating a del 13q14. (D) A human lymphocyte (bright) surrounded by 5 mouse lymphocytes (dim) showing one red signal for LSI p53 (chromosome 17p13.1) and two green signals for LSI ATM (chromosome 11q23) indicating the del 17p13.1 (del p53). (E) A human lymphocyte (bright) surrounded by 5 mouse lymphocytes (dim) showing two red signals for LSI p53 (chromosome 17p13.1) and one green signal for LSI ATM (chromosome 11q23) indicating a del 11q23 (del ATM).

**Figure S2 CLL cells recovered from murine spleens show proliferative activity and up-regulation of survivin and CD100**

(A-D) Expression of survivin and CD100 in human CLL cells. For survivin and CD100 expression one representative experiment, each, is given in panel (A,C) (white area: donor cells prior to transplantation; grey area: CLL cells recovered from spleen), whereas panels (B,D) compare mean fluorescence intensity (MFI) data prior to transplantation into NOD/SCID mice and upon recovery from murine spleens for n=6 (survivin) and n=5 (CD100) experiments, respectively. P-values denote significant differences ( $p \leq 0.05$ ) by Wilcoxon test.

**Figure S3 CLL cells recovered from murine spleens show proliferative activity by BrdU incorporation**

Confirmation of proliferative activity by BrdU incorporation in CLL cells recovered from the murine spleen. A representative experiments is depicted (A; negative control, animals not receiving BrdU) in (B) showing that 22.3 % of the CD19<sup>+</sup> CLL cells have incorporated BrdU.
